# Supplementary material for: Epidemiology and Clinical Outcomes of Microscopic Colitis: Preliminary Results From the Loyola University Microscopic Colitis Registry (LUMiCoR)
Source: PubMed Central journal article supplement (PMC8493955; doi:10.3389/fmed.2021.715458), 2021-09-20
Supplement: Data_Sheet_1.pdf [file Data_Sheet_1.pdf]

**Appendix 1: Bivariate Association of Monotherapy & Symptom Resolution**

| Monotherapy                                                                         | Symptom Resolution  |                   |
|-------------------------------------------------------------------------------------|---------------------|-------------------|
|                                                                                     | Unresolved Symptoms | Resolved Symptoms |
| Bile Acid Binder                                                                    | 0 (0.00)            | 1 (100.00)        |
| 5-Aminosalicylates                                                                  | 0 (0.00)            | 5 (100.00)        |
| Bismuth Subsalicylate                                                               | 2 (28.57)           | 5 (71.43)         |
| Steroids (Budesonide or Prednisone)                                                 | 13 (20.97)          | 49 (79.03)        |
| Antimotility Agent                                                                  | 2 (25.00)           | 6 (75.00)         |
| Fiber                                                                               | 1 (25.00)           | 3 (75.00)         |
| Dietary Changes / No Specific Treatment / Stopping or Avoiding Offending Medication | 2 (13.33)           | 13 (86.67)        |

**Appendix 2: Bivariate Association of Combination Therapy & Symptom Resolution**

| Combination Therapy                                                                                                                                                                                                                         | Symptom Resolution  |                   |
|---------------------------------------------------------------------------------------------------------------------------------------------------------------------------------------------------------------------------------------------|---------------------|-------------------|
|                                                                                                                                                                                                                                             | Unresolved Symptoms | Resolved Symptoms |
| Other Treatments*                                                                                                                                                                                                                           | 3 (60.00)           | 2 (40.00)         |
| Non-Budesonide Combination Therapy                                                                                                                                                                                                          | 4 (26.67)           | 11 (73.33)        |
| Budesonide Combination Therapy                                                                                                                                                                                                              | 12 (27.27)          | 32 (72.73)        |
| *Other treatments: Anti-TNF, Immunomodulators, antibiotics , surgery<br>Budesonide combination therapy= Budesonide + any of the treatments listed in appendix 1<br>Non-Budesonide therapy= Any combination of treatments without budesonide |                     |                   |
